# Supplementary material for: Phosphorus flow analysis of different crops in Dongying District, Shandong Province, China, 1995–2016
Source: PeerJ. 2022 Apr 19;10:e13274. doi: 10.7717/peerj.13274 (PMC9029382; doi:10.7717/peerj.13274)
Supplement: Supplemental Information 1 [file peerj-10-13274-s001.xlsx]

## Sheet: area and harvest information
Area and Harvest information
Year	Wheat		Maize		Rice		Soybean		Peanut		Cotton		Fruit-Vegetable
	area (ha)	harvest (t)	area (ha)	harvest (t)	area (ha)	harvest (t)	area (ha)	harvest (t)	area (ha)	harvest (t)	area (ha)	harvest (t)	area (ha)	harvest (t)
1995	91734	431030	45252	251899	9523	61597	60773	110064	3918	7794	29294	19615	16082	673775
1998	100966	510039	45250	273450	14855	85986	66377	121562	3180	8992	21554	16063	24886	1395785
2001	78855	396320	48764	304490	11917	66238	33659	50550	4039	10636	39186	45796	39999	2046654
2004	31438	187346	38720	261585	4509	26101	7593	14053	1758	5782	98731	107304	35065	2049104
2007	43831	283981	51187	372404	5963	41948	4378	9961	1852	6231	113437	115718	36321	2239211
2010	52933.6	329400	58053.6	410600	6479	44328	2298	4929	1513	4720	124601	118100	30924.2	1907300
2013	52200	341000	67647	347207	5160.03	26349	2029	2989	1024	2655	128094	95424	25618	1589231
2016	81740.4	507800	77599	459500	6042	33685	757	1335	1277	4115	56446.9	71700	21500	1209243
Note:the information of area and harvest of those crop systems (wheat, maize, rice, soybean, peanut, cotton, and fruit-vegetable)were obtained based on the Dongying Statistical Yearbook.

## Sheet: P input-atmospheric deposition
equation:
Year	Wheat					Maize					Rice					Soybean					Peanut					Cotton					Fruit-Vegetable
	Aarea （ha）	wwind (kg /ha)	Apreci (mm)	rrain (mg/L)	Patmos (t)	Aarea （ha）	wwind (kg /ha)	Apreci (mm)	rrain (mg/L)	Patmos (t)	Aarea （ha）	wwind (kg /ha)	Apreci (mm)	rrain (mg/L)	Patmos (t)	Aarea （ha）	wwind (kg /ha)	Apreci (mm)	rrain (mg/L)	Patmos (t)	Aarea （ha）	wwind (kg /ha)	Apreci (mm)	rrain (mg/L)	Patmos (t)	Aarea （ha）	wwind (kg /ha)	Apreci (mm)	rrain (mg/L)	Patmos (t)	Aarea （ha）	wwind (kg /ha)	Apreci (mm)	rrain (mg/L)	Patmos (t)
1995	91734	0.05	533.9	0.01	9.48438	45252	0.05	533.9	0.01	4.6786	9523	0.05	533.9	0.01	0.984583	60773	0.05	533.9	0.01	6.28332	3918	0.05	533.9	0.01	0.405082	29294	0.05	533.9	0.01	3.02871	16082	0.05	533.9	0.01	1.66272
1998	100966	0.05	462.1	0.01	9.71394	45250	0.05	462.1	0.01	4.3535	14855	0.05	462.1	0.01	1.4292	66377	0.05	462.1	0.01	6.38613	3180	0.05	462.1	0.01	0.305948	21554	0.05	462.1	0.01	2.07371	24886	0.05	462.1	0.01	2.39428
2001	78855	0.05	369.9	0.01	6.8596	48764	0.05	369.9	0.01	4.24198	11917	0.05	369.9	0.01	1.03666	33659	0.05	369.9	0.01	2.928	4039	0.05	369.9	0.01	0.351353	39186	0.05	369.9	0.01	3.40879	39999	0.05	369.9	0.01	3.47951
2004	31438	0.05	639.7	0.01	3.58299	38720	0.05	639.7	0.01	4.41292	4509	0.05	639.7	0.01	0.513891	7593	0.05	639.7	0.01	0.865374	1758	0.05	639.7	0.01	0.200359	98731	0.05	639.7	0.01	11.2524	35065	0.05	639.7	0.01	3.99636
2007	43831	0.05	360.3	0.01	3.77078	51187	0.05	360.3	0.01	4.40362	5963	0.05	360.3	0.01	0.512997	4378	0.05	360.3	0.01	0.376639	1852	0.05	360.3	0.01	0.159328	113437	0.05	360.3	0.01	9.75899	36321	0.05	360.3	0.01	3.1247
2010	52933.6	0.05	565	0.01	5.63743	58053.6	0.05	565	0.01	6.18271	6479	0.05	565	0.01	0.690014	2298	0.05	565	0.01	0.244737	1513	0.05	565	0.01	0.161135	124601	0.05	565	0.01	13.27	30924.2	0.05	565	0.01	3.29342
2013	52200	0.05	319.6	0.01	4.27831	67647	0.05	319.6	0.01	5.54435	5160.03	0.05	319.6	0.01	0.422916	2029	0.05	319.6	0.01	0.166297	1024	0.05	319.6	0.01	0.083927	128094	0.05	319.6	0.01	10.4986	25618	0.05	319.6	0.01	2.09965
2016	81740.4	0.05	643.4	0.01	9.3462	77599	0.05	643.4	0.01	8.87267	6042	0.05	643.4	0.01	0.690842	757	0.05	643.4	0.01	0.0865554	1277	0.05	643.4	0.01	0.146012	56446.9	0.05	643.4	0.01	6.45414	21500	0.05	643.4	0.01	2.45831
Note:
Patmos (t)	Atmospheric deposition P of wheat, maize, rice, soybean, peanut, cotton, fruit-vegetable, respectively (t)
Aarea (ha)	Sown areas of wheat, maize, rice, soybean, peanut, cotton, and fruit-vegetable, respectively (ha)
wwind (kg /ha)	Average wind erosion intensity per sown area (kg/ha)
Apreci (mm)	Precipitaiton (mm/ha)
rrain (mg/L)	P content in the rail fall (mg/L)
Aarea (ha)	the data were obtained based on the Dongying Statistical Yearbook
wwind (kg /ha)	the data were obtained based on the report of Wu et al.,(2016)
Apreci (mm)	the data were obtained based on the Dongying Statistical Yearbook
rrain (mg/L)	the data were obtained based on the report of Wu et al.,(2016)

## Sheet: P input-seeds
equation:
	Wheat				Maize				Rice				Soybean				peanut				Cotton				Fruit-Vegetable
Year	Aseed (ha)	wseed (kg/m2)	rseed	Pseed (t)	Aseed (ha)	wseed (kg/m2)	rseed	Pseed (t)	Aseed (ha)	wseed (kg/m2)	rseed	Pseed (t)	Aseed (ha)	wseed (kg/m2)	rseed	Pseed (t)	Aseed (ha)	wseed (kg/m2)	rseed	Pseed (t)	Aseed (ha)	wseed (kg/m2)	rseed	Pseed (t)	Aseed (ha)	wseed (kg/m2)	rseed	Pseed (t)
1995	91734	0.018	0.005	82.5606	45252	0.003	0.004	5.43024	9523	0.005	0.004	1.9046	60773	0.012	0.006	43.7566	3918	0.017	0.005	3.3303	29294	0.001	0.0078	2.28493	16082	0.006	0.0013	1.2544
1998	100966	0.018	0.005	90.8694	45250	0.003	0.004	5.43	14855	0.005	0.004	2.971	66377	0.012	0.006	47.7914	3180	0.017	0.005	2.703	21554	0.001	0.0078	1.68121	24886	0.006	0.0013	1.94111
2001	78855	0.018	0.005	70.9695	48764	0.003	0.004	5.85168	11917	0.005	0.004	2.3834	33659	0.012	0.006	24.2345	4039	0.017	0.005	3.43315	39186	0.001	0.0078	3.05651	39999	0.006	0.0013	3.11992
2004	31438	0.018	0.005	28.2942	38720	0.003	0.004	4.6464	4509	0.005	0.004	0.9018	7593	0.012	0.006	5.46696	1758	0.017	0.005	1.4943	98731	0.001	0.0078	7.70102	35065	0.006	0.0013	2.73507
2007	43831	0.018	0.005	39.4479	51187	0.003	0.004	6.14244	5963	0.005	0.004	1.1926	4378	0.012	0.006	3.15216	1852	0.017	0.005	1.5742	113437	0.001	0.0078	8.84809	36321	0.006	0.0013	2.83304
2010	52933.6	0.018	0.005	47.6402	58053.6	0.003	0.004	6.96643	6479	0.005	0.004	1.2958	2298	0.012	0.006	1.65456	1513	0.017	0.005	1.28605	124601	0.001	0.0078	9.71885	30924.2	0.006	0.0013	2.41208
2013	52200	0.018	0.005	46.98	67647	0.003	0.004	8.11764	5160.03	0.005	0.004	1.03201	2029	0.012	0.006	1.46088	1024	0.017	0.005	0.8704	128094	0.001	0.0078	9.99133	25618	0.006	0.0013	1.9982
2016	81740.4	0.018	0.005	73.5664	77599	0.003	0.004	9.31188	6042	0.005	0.004	1.2084	757	0.012	0.006	0.54504	1277	0.017	0.005	1.08545	56446.9	0.001	0.0078	4.40286	21500	0.006	0.0013	1.677
Pseed (t)	P content of the seeds of wheat, maize, rice, soybean, peanut, cotton, fruit-vegetable, respectively (t)
Aseed (ha)	Sown areas of rice, wheat, peanut, cotton, vegetables and fruits, maize and beans respectively
wseed (kg/m2)	Amounts of seeds of rice, wheat, peanut, cotton, vegetables and fruits, maize and beans, per sown area
rseed	P-containing rates of seeds of rice, wheat, peanut, cotton, vegetables and fruits, maize and beans, respectively
Aseed (ha)	the data were obtained based on the Dongying Statistical Yearbook
wseed (kg/m2)	the data were obtained from the local farmers （face-to-face interviews）and the questionnaires
rseed	the data were obtained based on the report of Wu et al.,(2016)

## Sheet: P input-chemical fertilizers
equation:
Year	Wheat					Maize					Rice					Soybean					Peanut					Cotton					Fruit-Vegetable
	Pchem (t)	Bcom (t)	rcom	Bphos (t)	rphos	Pchem (t)	Bcom (t)	rcom	Bphos (t)	rphos	Pchem (t)	Bcom (t)	rcom	Bphos (t)	rphos	Pchem (t)	Bcom (t)	rcom	Bphos (t)	rphos	Pchem (t)	Bcom (t)	rcom	Bphos (t)	rphos	Pchem (t)	Bcom (t)	rcom	Bphos (t)	rphos	Pchem (t)	Bcom (t)	rcom	Bphos (t)	rphos
1995	2806.18	8593.55	0.1171	4122.49	0.4366	1011.97	1059.79	0.1171	2033.61	0.4366	239.08	446.053	0.1171	427.96	0.4366	2718.14	2846.58	0.1171	5462.23	0.4366	98.3635	183.517	0.1171	176.073	0.4366	1470.88	2744.23	0.1171	2632.92	0.4366	403.747	753.273	0.1171	722.719	0.4366
1998	3522.47	11855.7	0.1171	4888.15	0.4366	1112.02	1328.34	0.1171	2190.73	0.4366	416.127	872.157	0.1171	719.187	0.4366	3262.43	3897.08	0.1171	6427.13	0.4366	89.08	186.702	0.1171	153.956	0.4366	1207.57	2530.93	0.1171	2087.02	0.4366	697.121	1461.09	0.1171	1204.83	0.4366
2001	3263.25	11665.2	0.1171	4345.52	0.4366	1384.45	1803.45	0.1171	2687.27	0.4366	389.942	881.457	0.1171	656.719	0.4366	1911.21	2489.63	0.1171	3709.74	0.4366	132.162	298.75	0.1171	222.58	0.4366	2564.45	5796.89	0.1171	4318.91	0.4366	1308.83	2958.58	0.1171	2204.26	0.4366
2004	1728.73	6754.39	0.1171	2147.93	0.4366	1398.54	2079.73	0.1171	2645.46	0.4366	191.222	484.375	0.1171	308.067	0.4366	548.509	815.67	0.1171	1037.55	0.4366	74.5551	188.851	0.1171	120.111	0.4366	8374.18	21212.2	0.1171	13491.1	0.4366	1487.07	3766.82	0.1171	2395.74	0.4366
2007	2267.25	8960.78	0.1171	2789.61	0.4366	1728.7	2616.16	0.1171	3257.78	0.4366	237.072	609.536	0.1171	379.513	0.4366	295.71	447.518	0.1171	557.273	0.4366	73.6303	189.311	0.1171	117.87	0.4366	9019.87	23191	0.1171	14439.3	0.4366	1444.02	3712.72	0.1171	2311.64	0.4366
2010	2421.11	11137.6	0.1171	2558.17	0.4366	1582.52	3053.72	0.1171	2805.61	0.4366	216.523	681.613	0.1171	313.116	0.4366	125.285	241.757	0.1171	222.115	0.4366	50.5634	159.173	0.1171	73.1201	0.4366	8328.13	26216.8	0.1171	12043.4	0.4366	1033.46	3253.33	0.1171	1494.5	0.4366
2013	2475.41	11865.4	0.1171	2487.36	0.4366	1857.49	3844.14	0.1171	3223.41	0.4366	176.024	586.452	0.1171	245.878	0.4366	111.427	230.602	0.1171	193.366	0.4366	34.9317	116.381	0.1171	48.7941	0.4366	8739.33	29116.5	0.1171	12207.5	0.4366	873.906	2911.56	0.1171	1220.71	0.4366
2016	4920.52	23114.4	0.1171	5070.58	0.4366	2744.04	5485.84	0.1171	4813.67	0.4366	263.674	854.274	0.1171	374.801	0.4366	53.5378	107.032	0.1171	93.9175	0.4366	55.7285	180.554	0.1171	79.2157	0.4366	4926.71	15962	0.1171	7003.11	0.4366	938.263	3039.87	0.1171	1333.7	0.4366
Pchem (t)	P content of chemical fertilizers used in wheat, maize, rice, soybean, peanut, cotton, fruit-vegetable, respectively (t)
Bcom (t)	Amount of compound fertilizer used in wheat, maize, rice, soybean, peanut, cotton, fruit-vegetable, respectively (t)
rcom	P-containing rate of the compound fertilizer
Bphos (t)	Amount of phosphate fertilizer used in wheat, maize, rice, soybean, peanut, cotton, fruit-vegetable, respectively (t);
rphos	P-containing rate of the phosphate fertilizer
Bcom (t)	the data were obtained from the local farmers （face-to-face interviews）and the questionnaires
rcom	the data were obtained from the interview with manufacturing enterprises
Bphos (t)	the data were obtained from the local farmers （face-to-face interviews）and the questionnaires
rphos	the data were obtained from the interview with manufacturing enterprises

## Sheet: P input-pesticides
equation:
Year	Wheat			Maize			Rice			Soybean			Peanut			Cotton			Fruit-Vegetable
	Ppest (t)	Bpest (t)	rpest	Ppest (t)	Bpest (t)	rpest	Ppest (t)	Bpest (t)	rpest	Ppest (t)	Bpest (t)	rpest	Ppest (t)	Bpest (t)	rpest	Ppest (t)	Bpest (t)	rpest	Ppest (t)	Bpest (t)	rpest
1995	38.4632	1165.55	0.033	18.9738	574.962	0.033	3.99291	120.997	0.033	25.4816	772.169	0.033	1.64278	49.7813	0.033	12.2827	372.203	0.033	6.74304	204.334	0.033
1998	44.8791	1359.97	0.033	20.1135	609.5	0.033	6.60301	200.091	0.033	29.5044	894.073	0.033	1.4135	42.8334	0.033	9.5807	290.324	0.033	11.0618	335.205	0.033
2001	33.601	1018.21	0.033	20.7789	629.663	0.033	5.07797	153.878	0.033	14.3425	434.62	0.033	1.72106	52.1534	0.033	16.6976	505.988	0.033	17.044	516.485	0.033
2004	21.3717	647.627	0.033	26.322	797.638	0.033	3.06524	92.8861	0.033	5.16176	156.417	0.033	1.1951	36.2151	0.033	67.1178	2033.87	0.033	23.8374	722.344	0.033
2007	26.596	805.94	0.033	31.0595	941.197	0.033	3.61826	109.644	0.033	2.65651	80.5002	0.033	1.12377	34.0535	0.033	68.8319	2085.82	0.033	22.039	667.85	0.033
2010	39.2903	1190.61	0.033	43.0907	1305.78	0.033	4.80908	145.73	0.033	1.7057	51.688	0.033	1.12303	34.0313	0.033	92.4856	2802.59	0.033	22.9536	695.565	0.033
2013	41.1497	1246.96	0.033	53.3266	1615.96	0.033	4.06769	123.263	0.033	1.59948	48.469	0.033	0.807227	24.4614	0.033	100.977	3059.92	0.033	20.1949	611.966	0.033
2016	54.1658	1641.39	0.033	51.4215	1558.23	0.033	4.00377	121.326	0.033	0.501631	15.2009	0.033	0.846213	25.6428	0.033	37.4049	1133.48	0.033	14.2471	431.731	0.033
Ppest (t)	P content of the pesticide used in wheat, maize, rice, soybean, peanut, cotton, fruit-vegetable, respectively (t)
Bpest (t)	Amount of pesticide used in wheat, maize, rice, soybean, peanut, cotton, fruit-vegetable, respectively (t)
rpest	P-containing rate of the pesticide (%)
Bpest (t)	the data were obtained based on the Dongying Statistical Yearbook
rpest	the data were obtained based on the report of Wu et al.,(2016)

## Sheet: P input-straws return to filed
Year	Wheat						Maize						Rice						Soybean						Peanut						Cotton						Fruit-Vegetable
	Pretured straw (t)	Bgrain (t)	rgrain-straw	rstraw	rretured straw	rstub	Pretured straw (t)	Bgrain (t)	rgrain-straw	rstraw	rretured straw	rstub	Pretured straw (t)	Bgrain (t)	rgrain-straw	rstraw	rretured straw	rstub	Pretured straw (t)	Bgrain (t)	rgrain-straw	rstraw	rretured straw	rstub	Pretured straw (t)	Bgrain (t)	rgrain-straw	rstraw	rretured straw	rstub	Pretured straw (t)	Bgrain (t)	rgrain-straw	rstraw	rretured straw	rstub	Pretured straw (t)	Bgrain (t)	rgrain-straw	rstraw	rretured straw	rstub
1995	176.377	431030	1.1	0.0008	0.5	0.93	226.652	251899	1.29	0.0015	0.5	0.93	37.2354	61597	1	0.0013	0.5	0.93	34.3928	110064	1.05	0.002	0.16	0.93	8.6981	7794	1.5	0.0016	0.5	0.93	41.0444	19615	3	0.0015	0.5	0.93	0			0
1998	208.708	510039	1.1	0.0008	0.5	0.93	246.043	273450	1.29	0.0015	0.5	0.93	51.9785	85986	1	0.0013	0.5	0.93	37.9857	121562	1.05	0.002	0.16	0.93	10.0351	8992	1.5	0.0016	0.5	0.93	33.6118	16063	3	0.0015	0.5	0.93	0			0
2001	275.696	396320	1.1	0.0008	0.85	0.93	465.753	304490	1.29	0.0015	0.85	0.93	68.0695	66238	1	0.0013	0.85	0.93	55.2855	50550	1.05	0.002	0.56	0.93	20.1786	10636	1.5	0.0016	0.85	0.93	162.908	45796	3	0.0015	0.85	0.93	0			0
2004	130.325	187346	1.1	0.0008	0.85	0.93	400.125	261585	1.29	0.0015	0.85	0.93	26.8227	26101	1	0.0013	0.85	0.93	15.3695	14053	1.05	0.002	0.56	0.93	10.9696	5782	1.5	0.0016	0.85	0.93	381.707	107304	3	0.0015	0.85	0.93	0			0
2007	197.549	283981	1.1	0.0008	0.85	0.93	569.636	372404	1.29	0.0015	0.85	0.93	43.1079	41948	1	0.0013	0.85	0.93	10.8941	9961	1.05	0.002	0.56	0.93	11.8215	6231	1.5	0.0016	0.85	0.93	411.638	115718	3	0.0015	0.85	0.93	0			0
2010	229.144	329400	1.1	0.0008	0.85	0.93	628.061	410600	1.29	0.0015	0.85	0.93	45.5537	44328	1	0.0013	0.85	0.93	5.39075	4929	1.05	0.002	0.56	0.93	8.95478	4720	1.5	0.0016	0.85	0.93	420.111	118100	3	0.0015	0.85	0.93	0			0
2013	237.213	341000	1.1	0.0008	0.85	0.93	531.094	347207	1.29	0.0015	0.85	0.93	27.0775	26349	1	0.0013	0.85	0.93	3.26901	2989	1.05	0.002	0.56	0.93	5.03707	2655	1.5	0.0016	0.85	0.93	339.447	95424	3	0.0015	0.85	0.93	0			0
2016	353.246	507800	1.1	0.0008	0.85	0.93	702.859	459500	1.29	0.0015	0.85	0.93	34.6164	33685	1	0.0013	0.85	0.93	1.46006	1335	1.05	0.002	0.56	0.93	7.80698	4115	1.5	0.0016	0.85	0.93	255.055	71700	3	0.0015	0.85	0.93	0			0
Pretured straw (t)	P content of the straw return-to-field of wheat, maize, rice, soybean, peanut, cotton, fruit-vegetable, respectively (t)
Bgrain (t)	Harvest of wheat, maize, rice, soybean, peanut, cotton, fruit-vegetable, respectively (t)
rgrain-straw	Grain to straw ratio of wheat, maize, rice, soybean, peanut, cotton, fruit-vegetable, respectively;
rstraw	P-containing rate of straws of wheat, maize, rice, soybean, peanut, cotton, fruit-vegetable, respectively (%)
rretured straw	straw return-to-field ratio (%)
Bgrain (t)	the data were obtained based on the Dongying Statistical Yearbook
rgrain-straw	the data were obtained based on the report of Wu et al.,(2016)
rstraw	the data were obtained based on the report of Wu et al.,(2016)
rretured straw	Questionnaire from local residents

## Sheet: P input-irrigation
	Wheat			Maize			Rice			Soybean			Peanut			Cotton			Fruit-Vegetable
Year	Pirrig (t)	Airrig (ha)	rirrig (kg/ha)	Pirrig (t)	Airrig (ha)	rirrig (kg/ha)	Pirrig (t)	Airrig (ha)	rirrig (kg/ha)	Pirrig (t)	Airrig (ha)	rirrig (kg/ha)	Pirrig (t)	Airrig (ha)	rirrig (kg/ha)	Pirrig (t)	Airrig (ha)	rirrig (kg/ha)	Pirrig (t)	Airrig (ha)	rirrig (kg/ha)
1995	23.2758	51724.1	0.45	11.4819	25515.3	0.45	2.41629	5369.53	0.45	15.42	34266.8	0.45	0.994121	2209.16	0.45	7.43282	16517.4	0.45	4.08052	9067.81	0.45
1998	23.8957	53101.6	0.45	10.7094	23798.6	0.45	3.51575	7812.78	0.45	15.7095	34910	0.45	0.752614	1672.48	0.45	5.10121	11336	0.45	5.8898	13088.4	0.45
2001	19.63	43622.3	0.45	12.1392	26976.1	0.45	2.9666	6592.44	0.45	8.37901	18620	0.45	1.00546	2234.36	0.45	9.75489	21677.5	0.45	9.95728	22127.3	0.45
2004	9.45353	21007.8	0.45	11.6433	25873.9	0.45	1.35587	3013.05	0.45	2.28324	5073.88	0.45	0.528637	1174.75	0.45	29.6888	65975.1	0.45	10.5442	23431.5	0.45
2007	12.971	28824.5	0.45	15.1479	33662	0.45	1.76465	3921.44	0.45	1.29559	2879.1	0.45	0.548067	1217.93	0.45	33.5697	74599.3	0.45	10.7486	23885.7	0.45
2010	14.2507	31668.1	0.45	15.6291	34731.3	0.45	1.74426	3876.14	0.45	0.618662	1374.81	0.45	0.407326	905.17	0.45	33.5447	74543.8	0.45	8.32533	18500.7	0.45
2013	15.4784	34396.5	0.45	20.0588	44575.1	0.45	1.53006	3400.13	0.45	0.601642	1336.98	0.45	0.303638	674.751	0.45	37.9826	84405.9	0.45	7.59629	16880.6	0.45
2016	28.4701	63266.9	0.45	27.0277	60061.5	0.45	2.10442	4676.5	0.45	0.263662	585.917	0.45	0.444778	988.396	0.45	19.6604	43689.8	0.45	7.48843	16641	0.45
Pirrig (t)	P content of irrigation in wheat, maize, rice, soybean, peanut, cotton, and fruit-vegetable, respectively (t);
Airrig (ha)	Irrigation areas of wheat, maize, rice, soybean, peanut, cotton, and fruit-vegetable, respectively (ha);
rirrig (kg/ha)	P content of irrigation per sown area of wheat, maize, rice, soybean, peanut, cotton, fruit-vegetable, respectively (kg/ha)
Airrig (ha)	the data were obtained based on the Dongying Statistical Yearbook
rirrig (kg/ha)	the data were obtained based on the report of Wu et al.,(2016)

## Sheet: P input-Residents' excrement
Year	Wheat				Maize				Rice				Soybean				Peanut				Cotton				Fruit-Vegetable
	Presid (t)	Bresid * Aiarea/Aarea	wresid (kg)	rresid	Presid (t)	Bresid * Aiarea/Aarea	wresid (kg)	rresid	Presid (t)	Bresid * Aiarea/Aarea	wresid (kg)	rresid	Presid (t)	Bresid * Aiarea/Aarea	wresid (kg)	rresid	Presid (t)	Bresid * Aiarea/Aarea	wresid (kg)	rresid	Presid (t)	Bresid * Aiarea/Aarea	wresid (kg)	rresid	Presid (t)	Bresid * Aiarea/Aarea	wresid (kg)	rresid
1995	242.366	349.482	0.73	0.95	65.4071	94.3145	0.73	0.95	151.374	218.275	0.73	0.95	162.632	234.51	0.73	0.95	10.7878	15.5556	0.73	0.95	80.1626	115.591	0.73	0.95	43.7406	63.0722	0.73	0.95
1998	265.101	382.265	0.73	0.95	118.81	171.32	0.73	0.95	39.0039	56.2421	0.73	0.95	174.282	251.308	0.73	0.95	8.34954	12.0397	0.73	0.95	56.5931	81.605	0.73	0.95	65.3417	94.2202	0.73	0.95
2001	224.934	324.346	0.73	0.95	139.099	200.576	0.73	0.95	33.9932	49.0169	0.73	0.95	96.0122	138.446	0.73	0.95	11.5212	16.6132	0.73	0.95	111.778	161.179	0.73	0.95	114.097	164.523	0.73	0.95
2004	107.243	154.64	0.73	0.95	132.083	190.459	0.73	0.95	15.3813	22.1792	0.73	0.95	25.9015	37.349	0.73	0.95	5.99696	8.64738	0.73	0.95	336.795	485.646	0.73	0.95	119.615	172.48	0.73	0.95
2007	129.172	186.262	0.73	0.95	150.851	217.521	0.73	0.95	17.5733	25.34	0.73	0.95	12.9022	18.6045	0.73	0.95	5.45795	7.87015	0.73	0.95	334.305	482.055	0.73	0.95	107.04	154.348	0.73	0.95
2010	82.5059	213.249	0.73	0.53	90.4863	233.875	0.73	0.53	5.98372	15.4658	0.73	0.53	2.76352	7.14272	0.73	0.53	1.51658	3.91983	0.73	0.53	194.211	501.967	0.73	0.53	48.2005	124.581	0.73	0.53
2013	95.5562	246.979	0.73	0.53	103.369	267.173	0.73	0.53	7.88487	20.3796	0.73	0.53	3.0969	8.0044	0.73	0.53	1.56474	4.04431	0.73	0.53	195.736	505.909	0.73	0.53	33.0064	85.31	0.73	0.53
2016	152.016	392.907	0.73	0.53	144.316	373.007	0.73	0.53	12.6091	32.5901	0.73	0.53	1.92174	4.96702	0.73	0.53	1.99613	5.15929	0.73	0.53	104.977	271.327	0.73	0.53	30.0783	77.7419	0.73	0.53
Presid (t)	P content of the residents’ excrement applied to the field of wheat, maize, rice, soybean, peanut, cotton, fruit-vegetable, respectively (t)
Bresid (ha)	The population of residents
wresid (kg)	P content of residents’ excrement (kg)
rresid	Proportion of residents’ excrement applied to the field (%)
Aiarea	Sown areas of wheat, maize, rice, soybean, peanut, cotton, and fruit-vegetable, respectively (ha);
Aarea	Sown area of all crop (ha)
Bresid (ha)	the data were obtained based on the Dongying Statistical Yearbook
wresid (kg)	the data were obtained based on the report of Wu et al.,(2016)
rresid	Questionnaire from local residents
Aiarea	the data were obtained based on the Dongying Statistical Yearbook
Aarea	the data were obtained based on the Dongying Statistical Yearbook

## Sheet: P input-livestocks' excrement
Year	Wheat										Maize										Rice										Soybean										Peanut
	Plivestock (t)	Blivestock * Aiarea/Aarea-pig	wlivestock (kg)-pig	rlivestock-pig	Blivestock * Aiarea/Aarea-cattle	wlivestock (kg)-cattle	rlivestock-cattle	Blivestock * Aiarea/Aarea-sheep	wlivestock (kg)-sheep	rlivestock-sheep	Plivestock (t)	Blivestock * Aiarea/Aarea-pig	wlivestock (kg)-pig	rlivestock-pig	Blivestock * Aiarea/Aarea-cattle	wlivestock (kg)-cattle	rlivestock-cattle	Blivestock * Aiarea/Aarea-sheep	wlivestock (kg)-sheep	rlivestock-sheep	Plivestock (t)	Blivestock * Aiarea/Aarea-pig	wlivestock (kg)-pig	rlivestock-pig	Blivestock * Aiarea/Aarea-cattle	wlivestock (kg)-cattle	rlivestock-cattle	Blivestock * Aiarea/Aarea-sheep	wlivestock (kg)-sheep	rlivestock-sheep	Plivestock (t)	Blivestock * Aiarea/Aarea-pig	wlivestock (kg)-pig	rlivestock-pig	Blivestock * Aiarea/Aarea-cattle	wlivestock (kg)-cattle	rlivestock-cattle	Blivestock * Aiarea/Aarea-sheep	wlivestock (kg)-sheep	rlivestock-sheep	Plivestock (t)	Blivestock * Aiarea/Aarea-pig	wlivestock (kg)-pig	rlivestock-pig	Blivestock * Aiarea/Aarea-cattle	wlivestock (kg)-cattle	rlivestock-cattle	Blivestock * Aiarea/Aarea-sheep	wlivestock (kg)-sheep
1995	1733.83	121652	1.02	0.95	96854	12.31	0.95	310202	1.64	0.95	467.909	32830.2	1.02	0.95	26137.9	12.31	0.95	83714	1.64	0.95	1082.9	75980.1	1.02	0.95	60491.9	12.31	0.95	193742	1.64	0.95	1163.44	81631.2	1.02	0.95	64991.1	12.31	0.95	208152	1.64	0.95	77.174	5414.81	1.02	0.95	4311.03	12.31	0.95	13807.3	1.64
1998	1147.45	66723.2	1.02	0.95	69675	12.31	0.95	172001	1.64	0.95	514.252	29903.4	1.02	0.95	31226.3	12.31	0.95	77085.8	1.64	0.95	168.822	9816.91	1.02	0.95	10251.2	12.31	0.95	25306.3	1.64	0.95	754.353	43865.1	1.02	0.95	45805.7	12.31	0.95	113077	1.64	0.95	36.1397	2101.5	1.02	0.95	2194.46	12.31	0.95	5417.3	1.64
2001	1286.69	97423.6	1.02	0.95	71868.4	12.31	0.95	225815	1.64	0.95	795.689	60246.8	1.02	0.95	44443.5	12.31	0.95	139644	1.64	0.95	194.451	14723.2	1.02	0.95	10861.1	12.31	0.95	34126.4	1.64	0.95	549.218	41584.9	1.02	0.95	30676.8	12.31	0.95	96388.3	1.64	0.95	65.9049	4990.1	1.02	0.95	3681.14	12.31	0.95	11566.4	1.64
2004	703.583	63911.2	1.02	0.95	35708.3	12.31	0.95	143815	1.64	0.95	866.555	78714.9	1.02	0.95	43979.4	12.31	0.95	177126	1.64	0.95	100.912	9166.47	1.02	0.95	5121.46	12.31	0.95	20626.6	1.64	0.95	169.932	15436	1.02	0.95	8624.37	12.31	0.95	34734.5	1.64	0.95	39.3441	3573.89	1.02	0.95	1996.79	12.31	0.95	8042.05	1.64
2007	716.597	72747.8	1.02	0.95	32919.9	12.31	0.95	167601	1.64	0.95	836.861	84956.8	1.02	0.95	38444.7	12.31	0.95	195729	1.64	0.95	97.4896	9896.99	1.02	0.95	4478.59	12.31	0.95	22801.4	1.64	0.95	71.5763	7266.31	1.02	0.95	3288.16	12.31	0.95	16740.6	1.64	0.95	30.2785	3073.83	1.02	0.95	1390.97	12.31	0.95	7081.69	1.64
2010	605.271	132713	1.02	0.59	50375.7	12.31	0.5	222552	1.64	0.59	663.816	145550	1.02	0.59	55248.3	12.31	0.5	244079	1.64	0.59	43.8972	9625.02	1.02	0.59	3653.49	12.31	0.5	16140.6	1.64	0.59	20.2734	4445.21	1.02	0.59	1687.32	12.31	0.5	7454.34	1.64	0.59	11.1258	2439.47	1.02	0.59	925.981	12.31	0.5	4090.85	1.64
2013	588.743	157309	1.02	0.59	49144	12.31	0.5	198009	1.64	0.59	636.881	170171	1.02	0.59	53162.2	12.31	0.5	214199	1.64	0.59	48.5805	12980.4	1.02	0.59	4055.15	12.31	0.5	16338.8	1.64	0.59	19.0807	5098.25	1.02	0.59	1592.72	12.31	0.5	6417.31	1.64	0.59	9.64072	2575.94	1.02	0.59	804.738	12.31	0.5	3242.41	1.64
2016	585.306	187680	1.02	0.59	37230.7	12.31	0.5	251349	1.64	0.59	555.662	178175	1.02	0.59	35345	12.31	0.5	238619	1.64	0.59	48.5488	15567.3	1.02	0.59	3088.13	12.31	0.5	20848.4	1.64	0.59	7.39927	2372.6	1.02	0.59	470.659	12.31	0.5	3177.48	1.64	0.59	7.6857	2464.44	1.02	0.59	488.878	12.31	0.5	3300.48	1.64
Plivestock (t)	P content of the livestock excrement applied to the field of wheat, maize, rice, soybean, peanut, cotton, fruit-vegetable, respectively (t);
Blivestock (ha)	The amount of pig, cattle and sheep, respectively;
wlivestock (kg)	P content of livestock excrement (kg);
rlivestock	Proportion of livestock excrement applied to the field (%);
Aiarea	Sown areas of wheat, maize, rice, soybean, peanut, cotton, and fruit-vegetable, respectively (ha);
Aarea	Sown area of all crop (ha)
Blivestock (ha)	the data were obtained based on the Dongying Statistical Yearbook
wlivestock (kg)	the data were obtained based on the report of Wu et al.,(2016)
rlivestock	Questionnaire from local residents
Aiarea	the data were obtained based on the Dongying Statistical Yearbook
Aarea	the data were obtained based on the Dongying Statistical Yearbook
[truncated: 21 more columns]

## Sheet: P output-Harvest grains
Year	Wheat			Maize			Rice			Soybean			Peanut			Cotton			Fruit-Vegetable
	Pgrain (t)	Bgrain (t)	rgrain	Pgrain (t)	Bgrain (t)	rgrain	Pgrain (t)	Bgrain (t)	rgrain	Pgrain (t)	Bgrain (t)	rgrain	Pgrain (t)	Bgrain (t)	rgrain	Pgrain (t)	Bgrain (t)	rgrain	Pgrain (t)	Bgrain (t)	rgrain
1995	2155.15	431030	0.005	1007.6	251899	0.004	246.388	61597	0.004	660.384	110064	0.006	38.97	7794	0.005	152.997	19615	0.0078	336.887	673775	0.0005
1998	2550.2	510039	0.005	1093.8	273450	0.004	343.944	85986	0.004	729.372	121562	0.006	44.96	8992	0.005	125.291	16063	0.0078	697.893	1395785	0.0005
2001	1981.6	396320	0.005	1217.96	304490	0.004	264.952	66238	0.004	303.3	50550	0.006	53.18	10636	0.005	357.209	45796	0.0078	1023.33	2046654	0.0005
2004	936.73	187346	0.005	1046.34	261585	0.004	104.404	26101	0.004	84.318	14053	0.006	28.91	5782	0.005	836.971	107304	0.0078	1024.55	2049104	0.0005
2007	1419.9	283981	0.005	1489.62	372404	0.004	167.792	41948	0.004	59.766	9961	0.006	31.155	6231	0.005	902.6	115718	0.0078	1119.61	2239211	0.0005
2010	1647	329400	0.005	1642.4	410600	0.004	177.312	44328	0.004	29.574	4929	0.006	23.6	4720	0.005	921.18	118100	0.0078	953.65	1907300	0.0005
2013	1705	341000	0.005	1388.83	347207	0.004	105.396	26349	0.004	17.934	2989	0.006	13.275	2655	0.005	744.307	95424	0.0078	794.615	1589231	0.0005
2016	2539	507800	0.005	1838	459500	0.004	134.74	33685	0.004	8.01	1335	0.006	20.575	4115	0.005	559.26	71700	0.0078	604.621	1209243	0.0005
Pgrain (t)	P content of the harvested grains of wheat, maize, rice, soybean, peanut, cotton, and fruit-vegetable, respectively (t)
Bgrain (t)	Harvest of wheat, maize, rice, soybean, peanut, cotton, fruit-vegetable, respectively (t)
rgrain	P-containing rate of grains of wheat, maize, rice, soybean, peanut, cotton, fruit-vegetable, respectively (%)
Bgrain (t)	the data were obtained based on the Dongying Statistical Yearbook
rgrain	the data were obtained based on the report of Wu et al.,(2016)

[truncated: 2 more sheets: P output-Discarded straw, P 0utput-Erosion and runoff]
