# Supplementary material for: Phosphorus flow analysis of different crops in Dongying District, Shandong Province, China, 1995–2016
Source: PeerJ. 2022 Apr 19;10:e13274. doi: 10.7717/peerj.13274 (PMC9029382; doi:10.7717/peerj.13274)
Supplement: Supplemental Information 2 [file peerj-10-13274-s002.xlsx]

## Sheet: Sheet1
	Supplementary Table1 Parameters for the phosphorus input and output of the cropping systems in Dongying City
	Parameter	Description	Source
	Aarea (ha)	Sown areas of wheat, maize, rice, soybean, peanut, cotton, and fruit-vegetable, respectively	The Dongying Statistical Yearbook
	wwind (kg /ha)	Average wind erosion intensity per sown area	The study of Smil (2000)
	Apreci (mm/ha)	Precipitaiton	The Dongying Statistical Yearbook
	rrain (mg/L)	P content in the rail fall	The study of Smil (2000)
	Aseed (ha)	Sown areas of rice, wheat, peanut, cotton, vegetables and fruits, maize and beans respectively	The Dongying Statistical Yearbook
	wseed (kg/m2)	Amounts of seeds of rice, wheat, peanut, cotton, vegetables and fruits, maize and beans, per sown area	Interview with local farmers
	rseed (%)	P-containing rates of seeds of rice, wheat, peanut, cotton, vegetables and fruits, maize and beans, respectively	The study of Wu et al.,(2016) and Smil (2000)
	Bcom (t)	Amount of compound fertilizer used in wheat, maize, rice, soybean, peanut, cotton, fruit-vegetable, respectively	Interview with local farmers
	rcom (%)	P-containing rate of the compound fertilizer	Interview with manufacturing enterprises
	Bphos (t)	Amount of phosphate fertilizer used in wheat, maize, rice, soybean, peanut, cotton, fruit-vegetable, respectively	Interview with local farmers
	rphos (%)	P-containing rate of the phosphate fertilizer	Interview with manufacturing enterprises
	Bpest (t)	Amount of pesticide used in wheat, maize, rice, soybean, peanut, cotton, fruit-vegetable, respectively	The Dongying Statistical Yearbook
	rpest (%)	P-containing rate of the pesticide	The study of Yan et al.,(2001)
	Bgrain (t)	Harvest of wheat, maize, rice, soybean, peanut, cotton, fruit-vegetable, respectively	The Dongying Statistical Yearbook
	rgrain-straw	Grain to straw ratio of wheat, maize, rice, soybean, peanut, cotton, fruit-vegetable, respectively	The studies of Wu et al.,(2016) and Smil (2000)
	rstraw (%)	P-containing rate of straws of wheat, maize, rice, soybean, peanut, cotton, fruit-vegetable, respectively	The studies of Wu et al.,(2016) and Smil (2000)
	rretured straw	straw return-to-field ratio	Questionnaire from local residents
	Airrig (ha)	Irrigation areas of wheat, maize, rice, soybean, peanut, cotton, and fruit-vegetable, respectively (ha);	The Dongying Statistical Yearbook
	rirrig (kg/ha)	P content of irrigation per sown area of wheat, maize, rice, soybean, peanut, cotton, fruit-vegetable, respectively (kg/ha)	The study of Chen et al.,(2008)
	Bresid (ha)	The population of residents	The Dongying Statistical Yearbook
	wresid (kg)	P content of residents’ excrement	The study of Wu et al.,(2016)
	rresid (%)	Proportion of residents’ excrement applied to the field (%)	Questionnaire from local residents
	Aiarea(ha)	Sown areas of wheat, maize, rice, soybean, peanut, cotton, and fruit-vegetable, respectively	The Dongying Statistical Yearbook
	Blivestock (ha)	The amount of pig, cattle and sheep, respectively	The Dongying Statistical Yearbook
	wlivestock (kg)	P content of livestock excrement	The study of Wu et al.,(2016)
	rlivestock (%)	Proportion of livestock excrement applied to the field	Questionnaire from local farmers
	Bgrain (t)	Harvest of wheat, maize, rice, soybean, peanut, cotton, fruit-vegetable, respectively	The Dongying Statistical Yearbook
	rgrain (%)	P-containing rate of grains of wheat, maize, rice, soybean, peanut, cotton, fruit-vegetable, respectively	The study of Wu et al.,(2016)
	rloss(kg/ha)	P loss content per unit of the area of wheat, maize, rice, soybean, peanut, cotton, fruit-vegetable, respectively	the studies of Chen et al. (2008), Fan et al.(2009), Senthilkumar et al.(2012), Wu et al.(2016) and Yan et al.(1999).
	Fp (kg/ha)	the appropriate amount of P fertilizers	Questionnaire from local farmers
	Lp (kg/ha)	the appopriate amount of excrement used	Questionnaire from local farmers
